# Supplementary material for: nBu2Sn(SnBu)2 and nBu3SnEnBu (E = S or Se) – effective single source precursors for the CVD of SnS and SnSe thermoelectric thin films
Source: Royal Society of Chemistry journal article supplement (doi:10.1039/d1ma00331c), 2021-01-01
Supplement: d1ma00331c1.pdf [file d1ma00331c1.pdf]

## Electronic supplementary information

### ${}^n\text{Bu}_2\text{Sn}(\text{S}^n\text{Bu})_2$ and ${}^n\text{Bu}_3\text{SnE}^n\text{Bu}$ (E = S or Se) - effective single source precursors for the CVD of SnS and SnSe thermoelectric thin films

Fred Robinson<sup>a</sup>, Peter J. Curran<sup>b</sup>, C. H. (Kees) de Groot<sup>c</sup>, Duncan Hardie,<sup>b</sup> Andrew L. Hector<sup>a</sup>, Katherine Holloway<sup>a</sup>, Ruomeng Huang<sup>c</sup>, Daniel W. Newbrook,<sup>c</sup> and Gillian Reid<sup>a\*</sup>

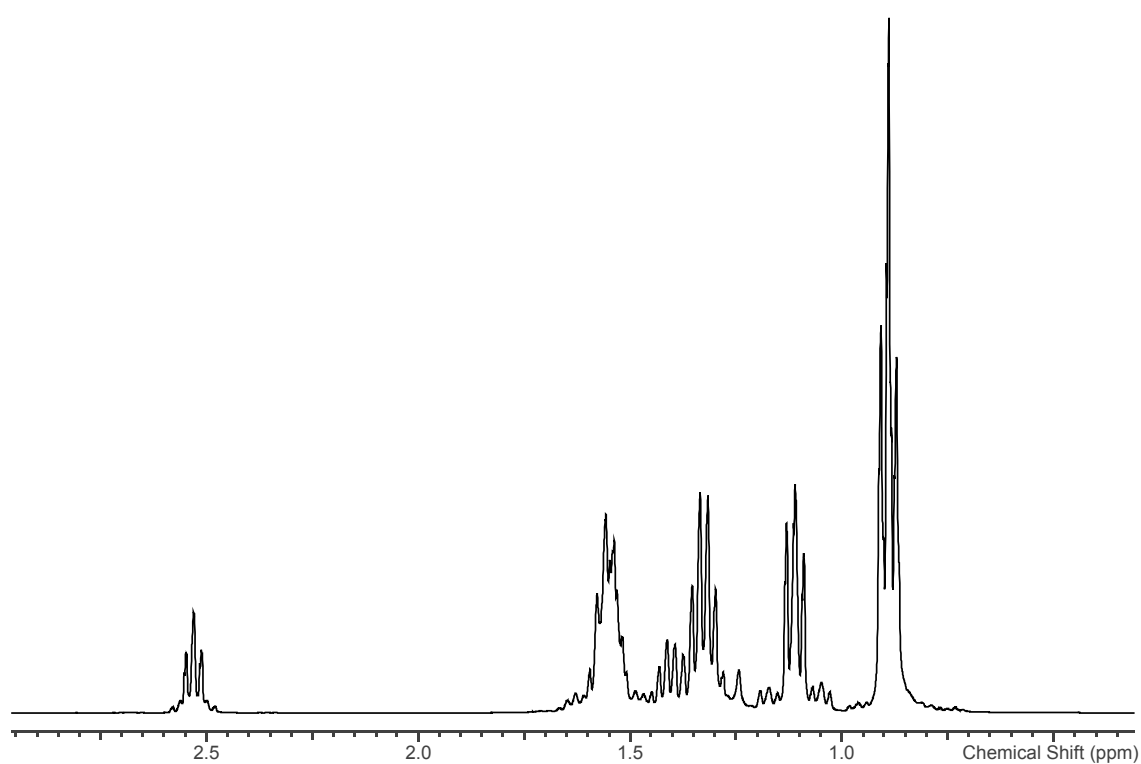

Figure S1-  ${}^1\text{H}$  NMR spectrum of  $[\text{Sn}^n\text{Bu}_3(\text{S}^n\text{Bu})]$  ( $\text{CDCl}_3$ )

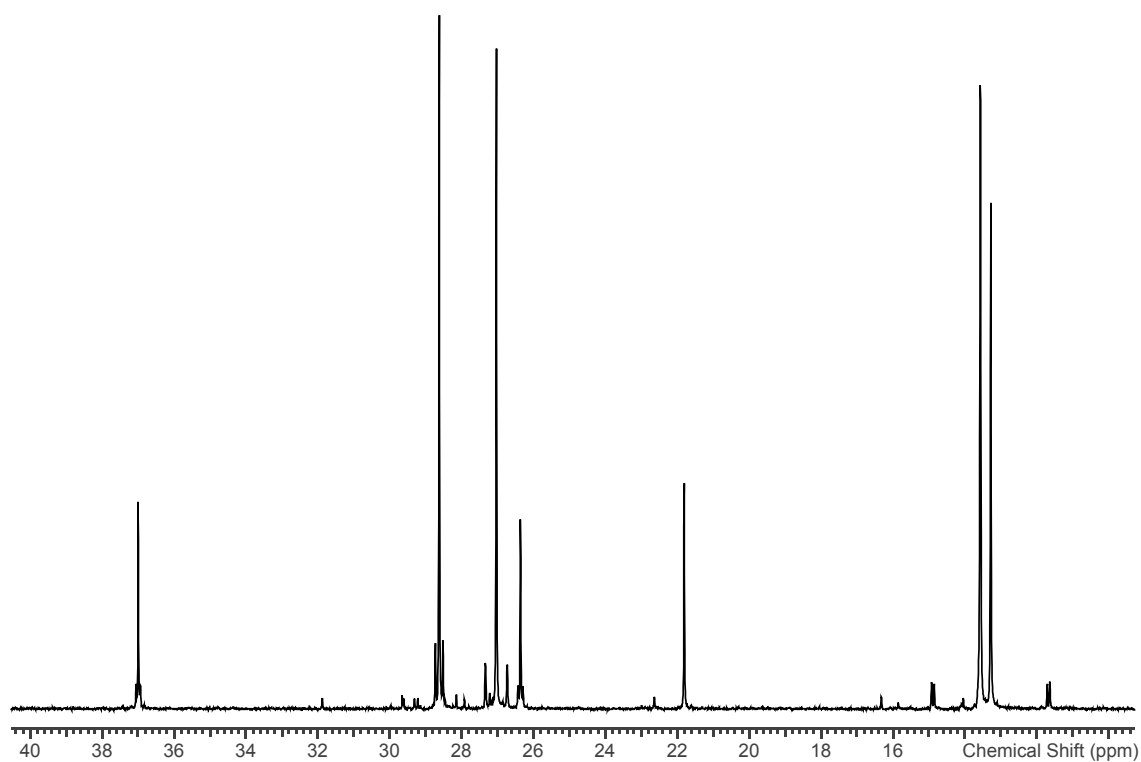

Figure S2-  $^{13}\text{C}\{^1\text{H}\}$  NMR spectrum of  $[\text{Sn}^n\text{Bu}_3(\text{S}^n\text{Bu})]$  ( $\text{CDCl}_3$ )

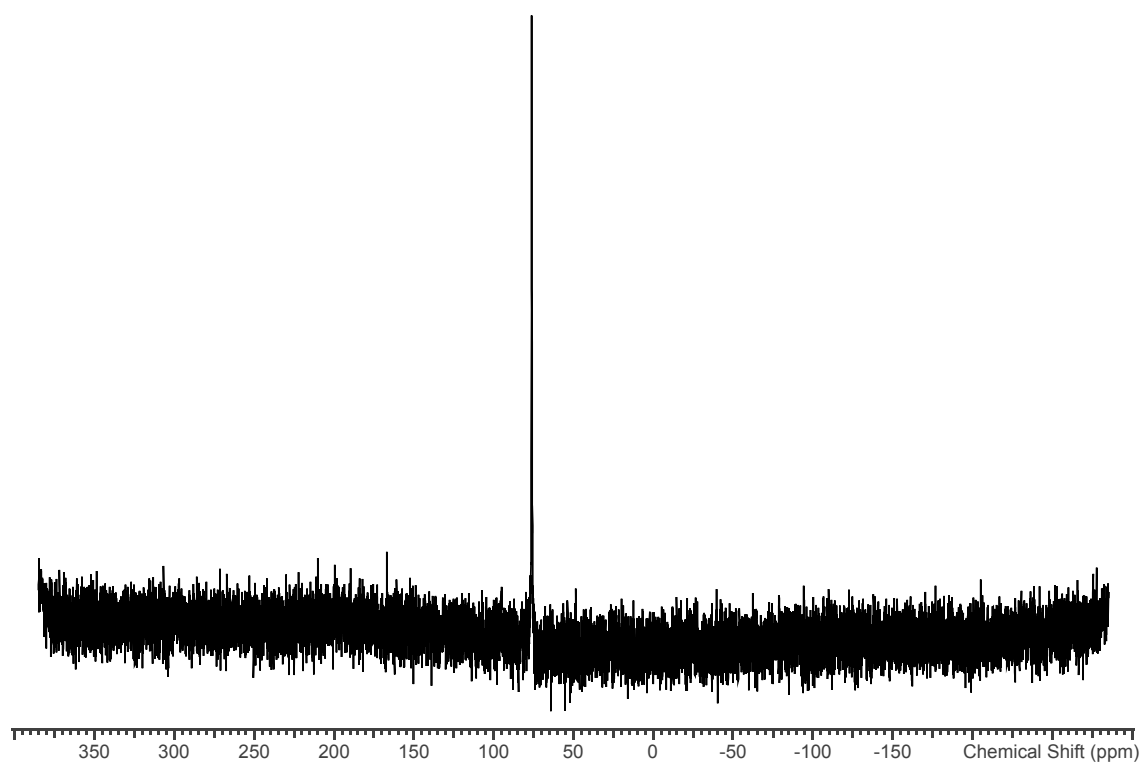

Figure S3-  $^{119}\text{Sn}\{^1\text{H}\}$  NMR spectrum of  $[\text{Sn}^n\text{Bu}_3(\text{S}^n\text{Bu})]$  ( $\text{CDCl}_3$ )

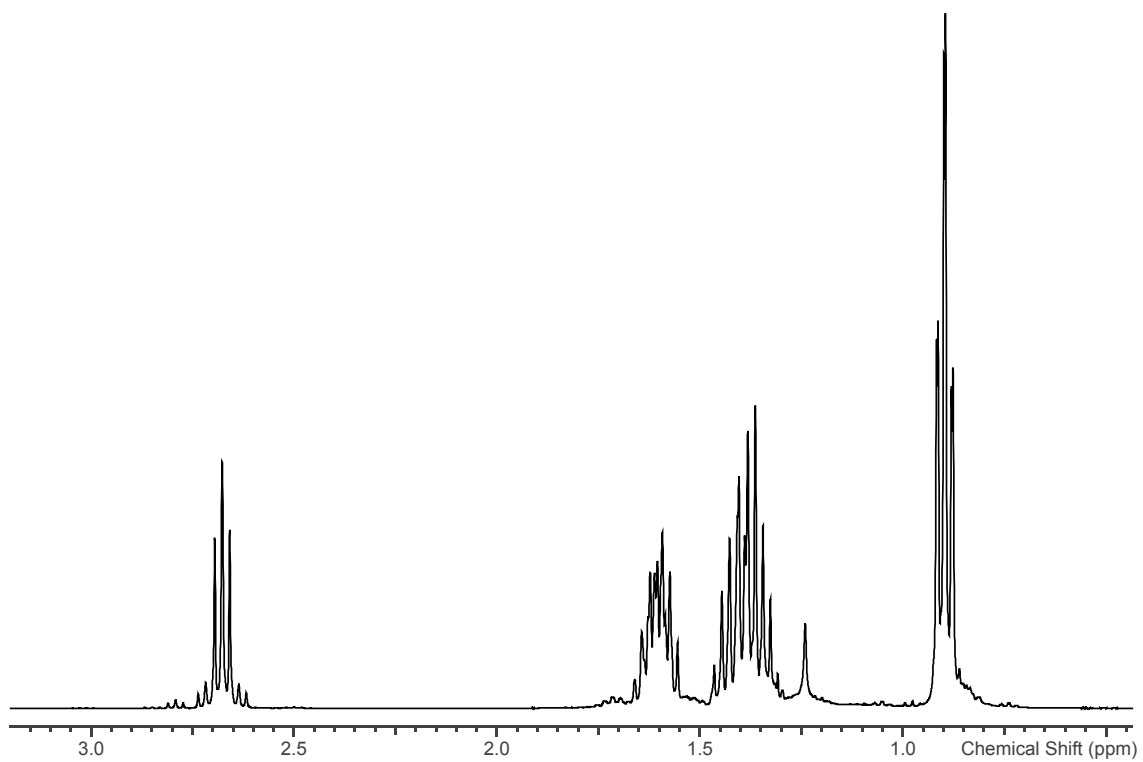

Figure S4-  $^1\text{H}$  NMR spectrum of  $[\text{Sn}^n\text{Bu}_2(\text{S}^n\text{Bu})_2]$  ( $\text{CDCl}_3$ )

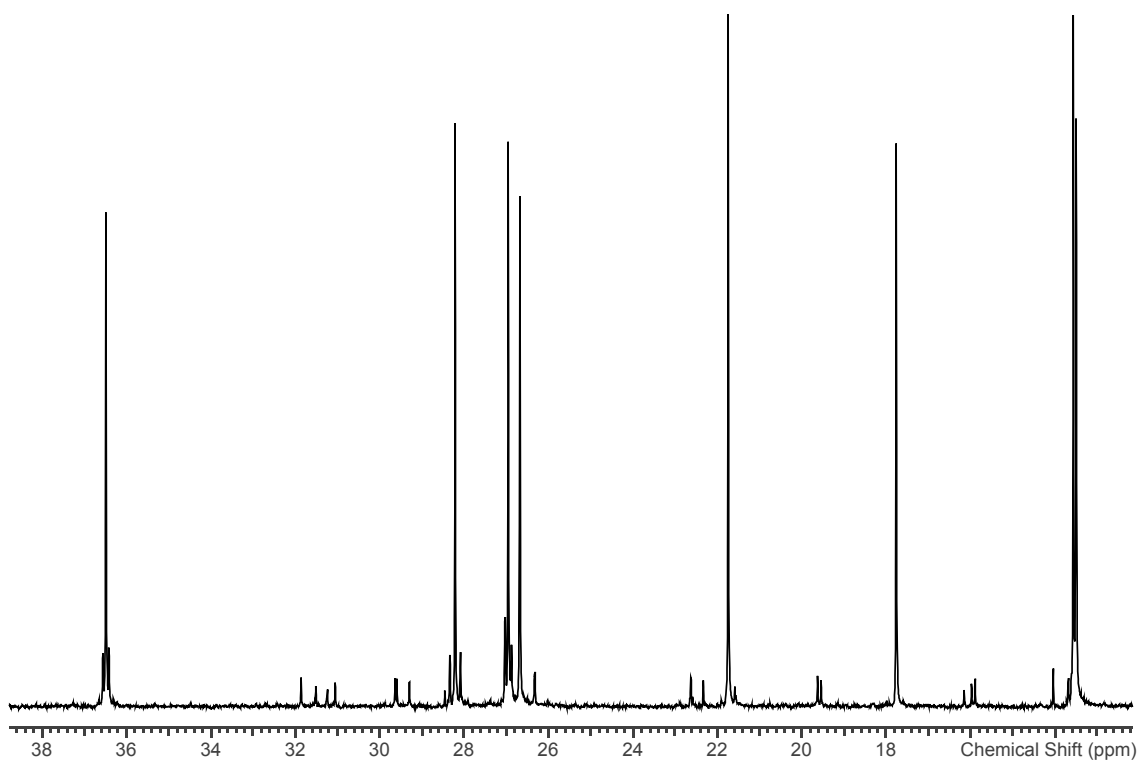

Figure S5-  $^{13}\text{C}\{^1\text{H}\}$  NMR spectrum of  $[\text{Sn}^n\text{Bu}_2(\text{S}^n\text{Bu})_2]$  ( $\text{CDCl}_3$ )

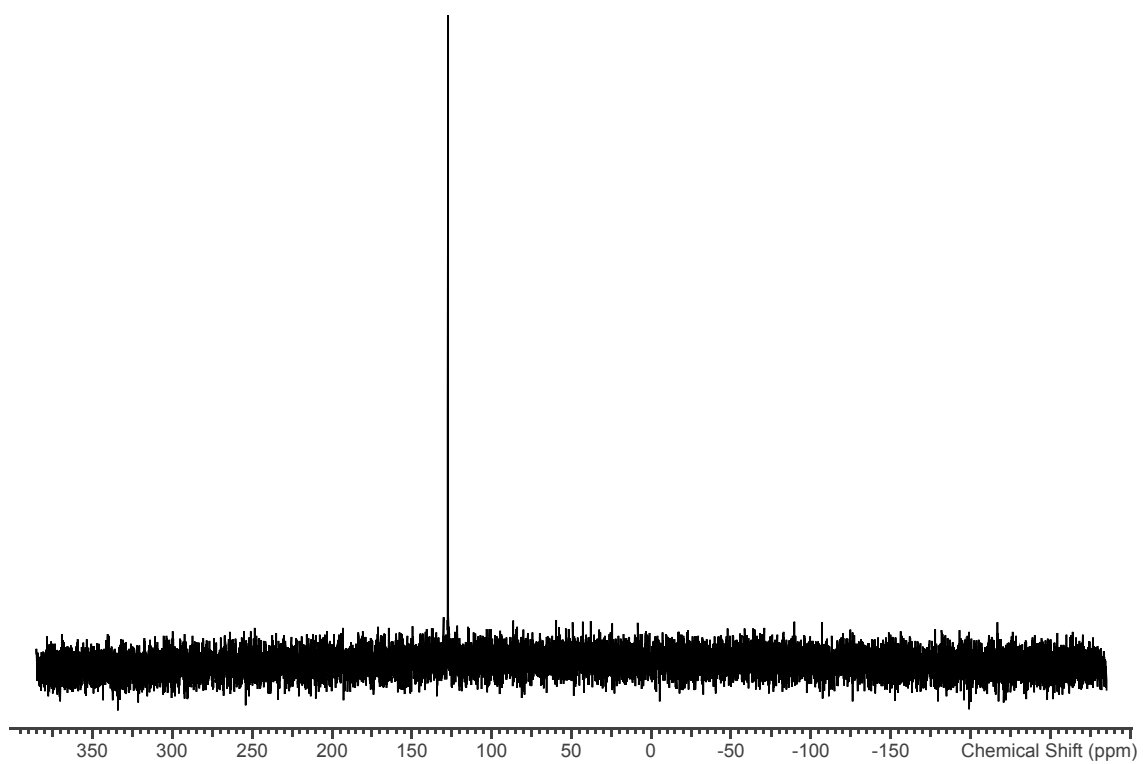

Figure S6-  $^{119}\text{Sn}\{^1\text{H}\}$  NMR spectrum of  $[\text{Sn}^n\text{Bu}_2(\text{S}^n\text{Bu})_2]$  ( $\text{CDCl}_3$ )

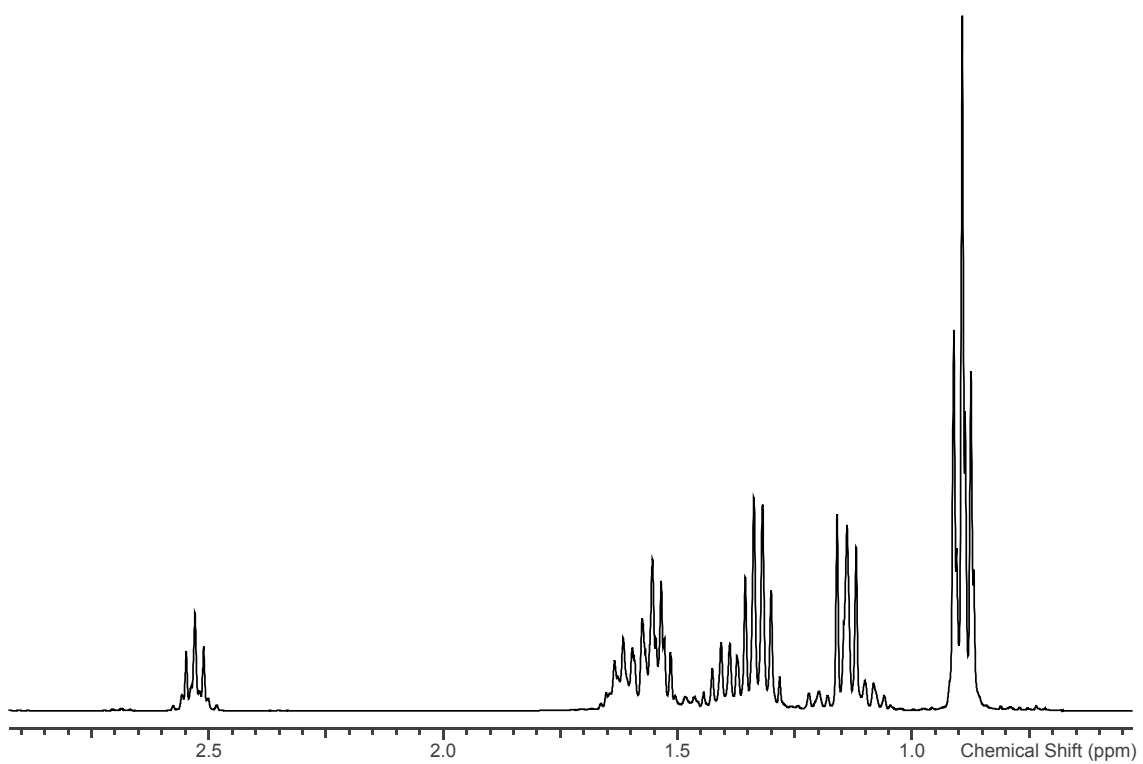

Figure S7-  $^1\text{H}$  NMR spectrum of  $[\text{Sn}^n\text{Bu}_3(\text{Se}^n\text{Bu})]$  ( $\text{CDCl}_3$ )

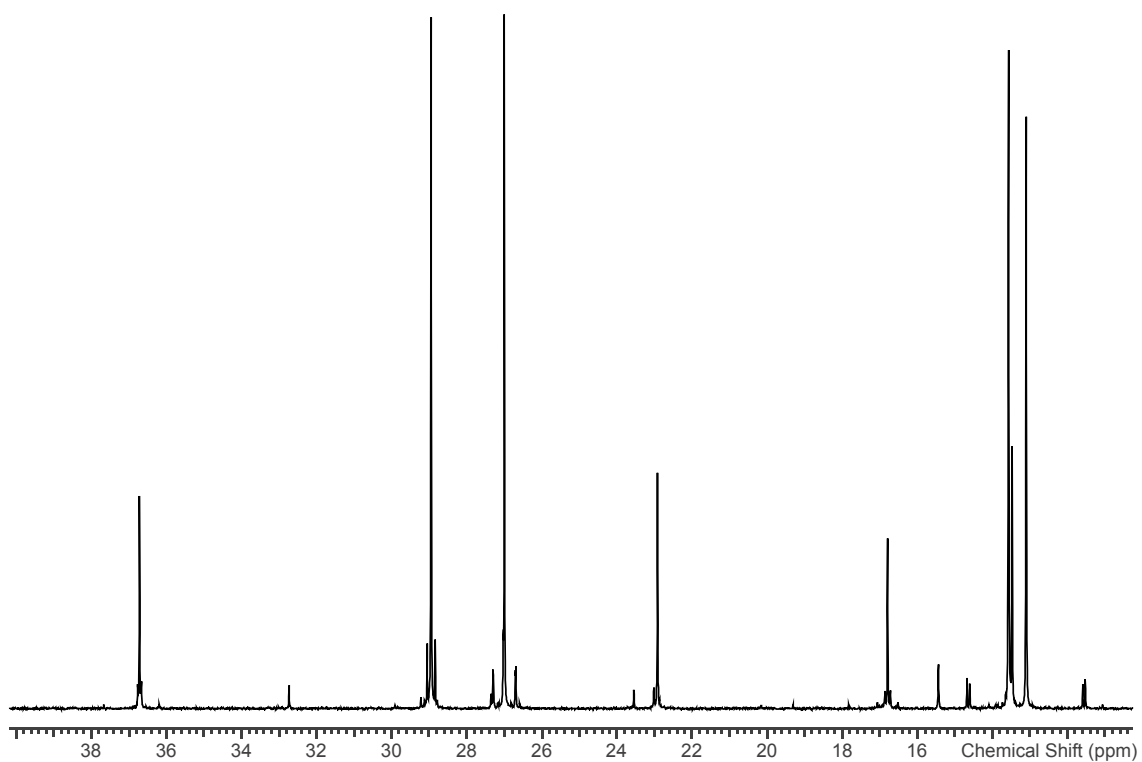

Figure S8-  $^{13}\text{C}\{^1\text{H}\}$  NMR spectrum of  $[\text{Sn}^n\text{Bu}_3(\text{Se}^n\text{Bu})]$  ( $\text{CDCl}_3$ )

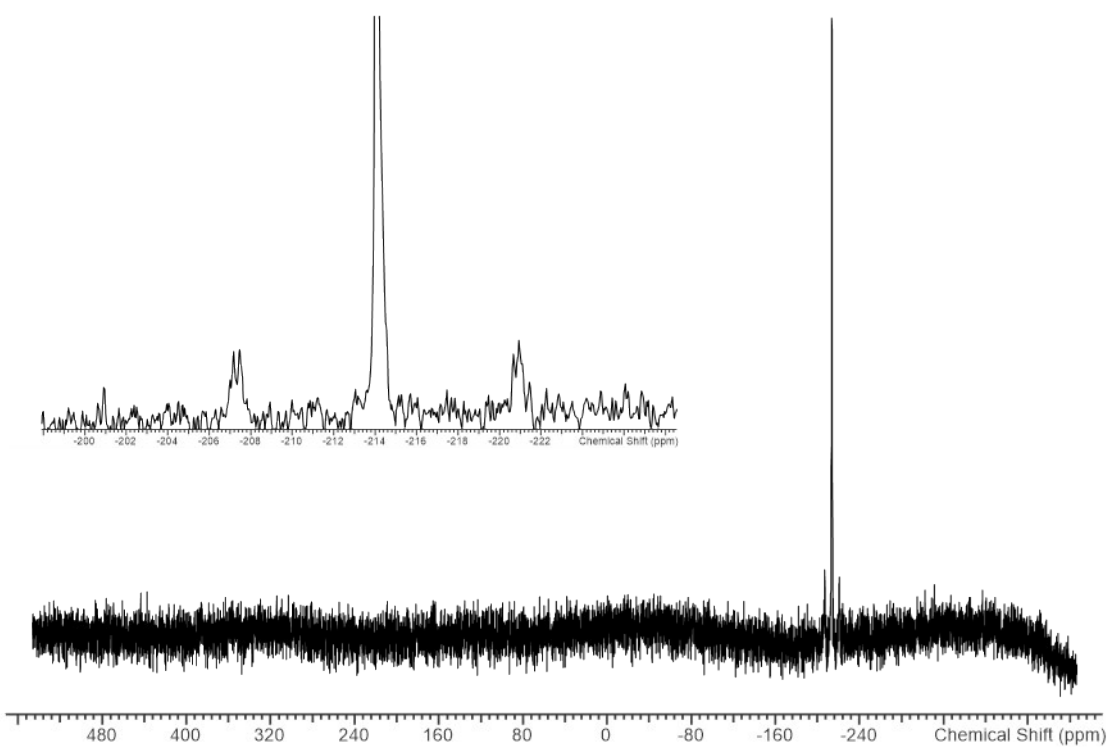

Figure S9-  $^{77}\text{Se}\{^1\text{H}\}$  NMR spectrum of  $[\text{Sn}^n\text{Bu}_3(\text{Se}^n\text{Bu})]$  ( $\text{CDCl}_3$ ) (insert shows an expanded view with the  $^{117}/^{119}\text{Sn}$  satellites clearly visible).

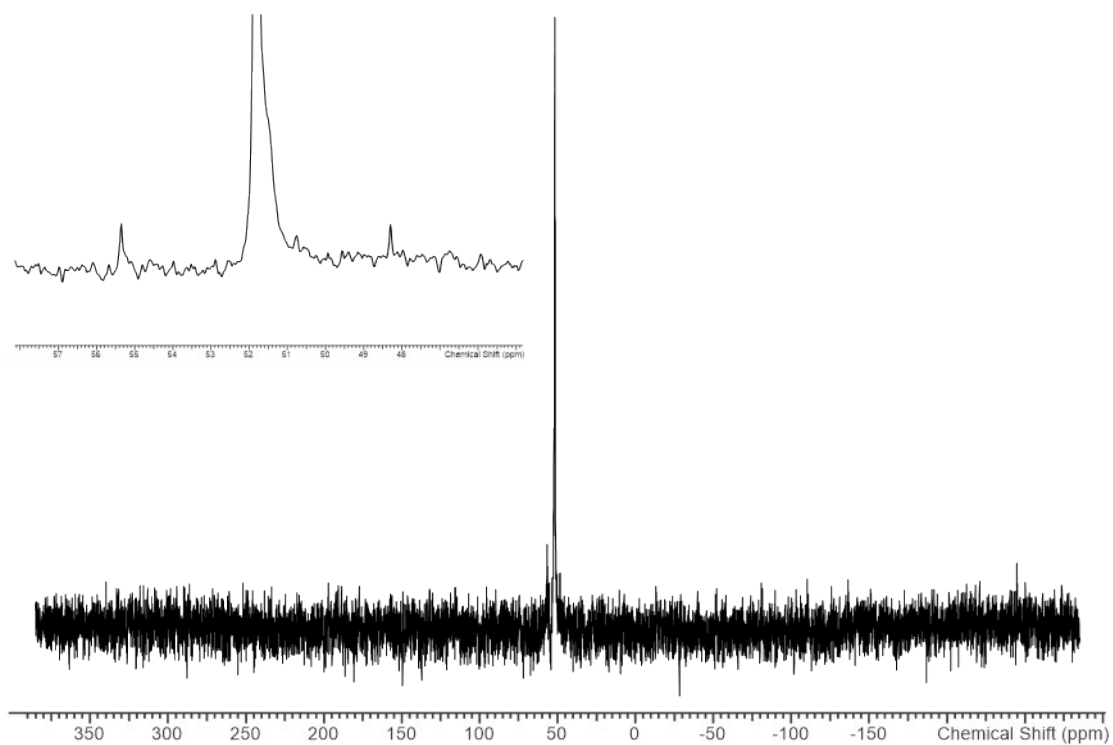

Figure S10-  $^{119}\text{Sn}\{^1\text{H}\}$  NMR spectrum of  $[\text{Sn}^n\text{Bu}_3(\text{S}^n\text{Bu})]$  ( $\text{CDCl}_3$ ) (insert shows an expanded view with the  $^{77}\text{Se}$  satellites clearly visible)

| Sample                    | Precursor | O%   | Si%  | S%   | Sn%  |
|---------------------------|-----------|------|------|------|------|
| Dep <sup>n</sup> 1 tile 1 | (1)       | 7.8  | 1.2  | 36.4 | 54.6 |
| Dep <sup>n</sup> 2 tile 1 | (1)       | -    | -    | 40.2 | 59.8 |
| Dep <sup>n</sup> 2 tile 2 | (1)       | -    | -    | 39.9 | 60.1 |
| Dep <sup>n</sup> 3 tile 1 | (2)       | 6.6  | 1.3  | 40.8 | 51.3 |
| Dep <sup>n</sup> 4 tile 1 | (2)       | -    | 0.7  | 44.2 | 55.0 |
| Dep <sup>n</sup> 5 tile 1 | (2)       | 13.4 | 24.1 | 31.2 | 31.2 |
| Dep <sup>n</sup> 5 tile 2 | (2)       | 12.3 | 12.5 | 37.2 | 38.1 |

Table S1: Energy dispersive X-ray analysis results for some SnS films (atom % values); (1) =  $\text{Sn}^n\text{Bu}_3(\text{S}^n\text{Bu})$ ; (2) =  $\text{Sn}^n\text{Bu}_2(\text{S}^n\text{Bu})_2$

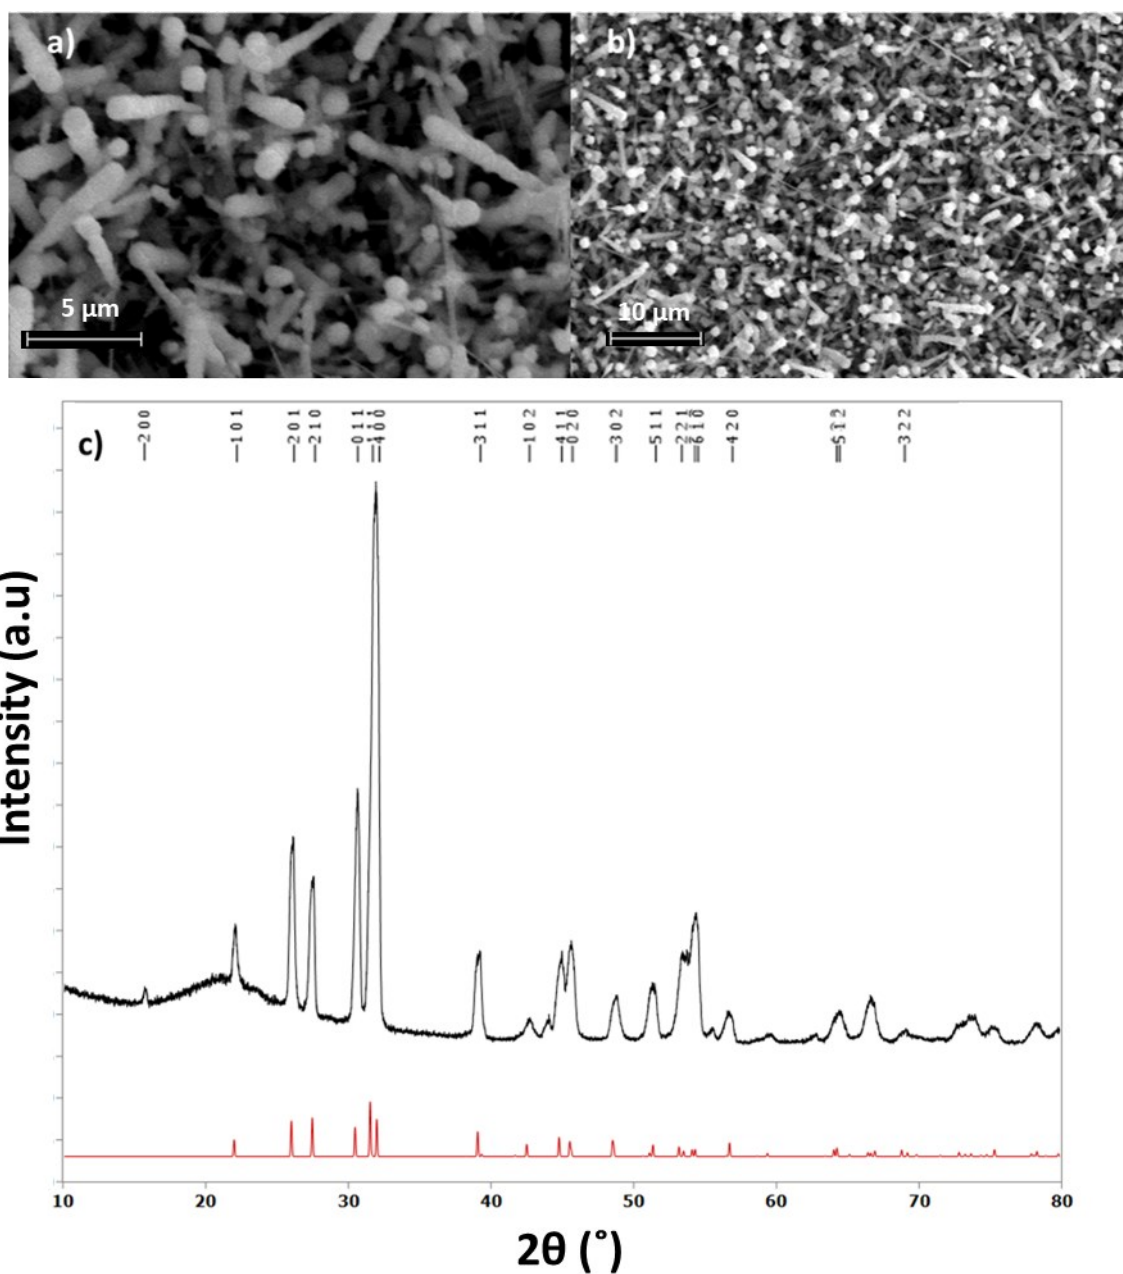

Figure S11: Top down SEM images a) and b) of two thin films of sulfur deficient SnS deposited using (1) and c) a GIXRD pattern (black) for the film seen in b) matched to a bulk literature pattern (red).<sup>15</sup>

| Sample                    | %C   | %O   | % Si | %Se  | %Sn  |
|---------------------------|------|------|------|------|------|
| dep <sup>n</sup> 1        | -    | 11.3 | 29.4 | 29.1 | 30.2 |
| dep <sup>n</sup> 2 tile 1 | 17.4 | 10.1 | -    | 35.4 | 37.1 |
| dep <sup>n</sup> 2 tile 2 | -    | 7.54 | 4.2  | 44.4 | 43.9 |
| dep <sup>n</sup> 3        | 11.7 | 7.1  | -    | 38.9 | 42.3 |
| dep <sup>n</sup> 4        | 12.2 | 8.0  | 7.1  | 37.5 | 35.2 |

Table S2: Energy dispersive X-ray analysis results for SnSe thin films (atom % values)
